# Supplementary material for: System Identification, Fuzzy Control, and Simulation Results for Fixed Length Tether of Kite Power System
Source: Copernicus journal article supplement (doi:10.5194/wes-2017-26), 2017-06-29
Supplement: Supplementary file [file wes-2017-26-AC1-supplement.pdf]

**Received and published: 3 July 2017**

To say AWE follows two different concepts; Massively limits the rich conceptual space openly identified in AWES.

The reviewer is correct in his opinion and the paper was modified to adapt this point (page 3 line: 20) as following:

Power generation by AWE follows several concepts, however, in this paper we mentioned just two different concepts.
